# Supplementary material for: The anti-fibrotic effect of GV1001 combined with gemcitabine on treatment of pancreatic ductal adenocarcinoma
Source: PubMed Central journal article supplement (PMC5342724; doi:10.18632/oncotarget.12057), 2016-09-16
Supplement: oncotarget-07-75081-s001.pdf [file oncotarget-07-75081-s001.pdf]

# The anti-fibrotic effect of GV1001 combined with gemcitabine on treatment of pancreatic ductal adenocarcinoma

## SUPPLEMENTARY FIGURES

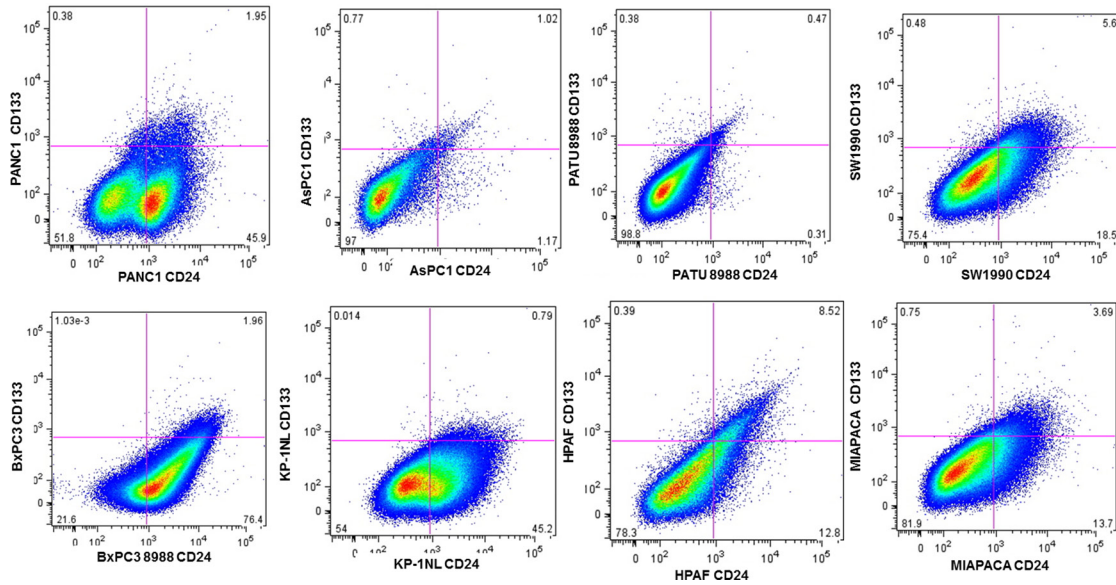

Supplementary Figure S1: FACS analysis of CD133+ PDAC cell lines.

A

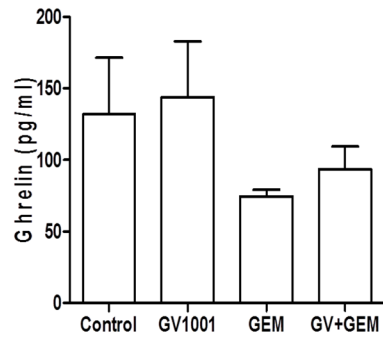

B

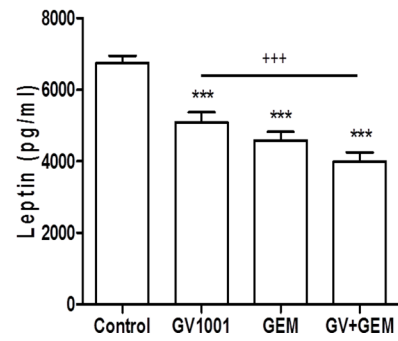

**Supplementary Figure S2: Ghrelin and Leptin level among the different treatment groups.** A. Ghrelin level was measured among the different treatment group B. Leptin level was measured among the different treatment group.
